# Supplementary material
Source: PubMed Central journal article supplement (PMC5421616)
Supplement: Supp_Fig2.pdf [file Supp_Fig2.pdf]

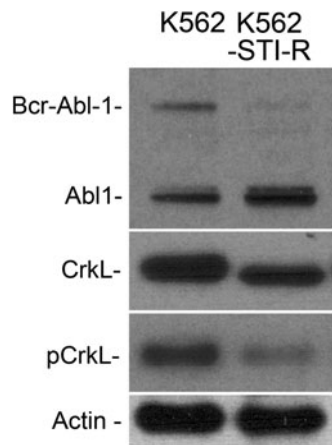

**SUPPLEMENTARY FIG. S2.** Western blot analysis was performed on the whole cell lysates of K562 control or K562-STI-R. Protein levels of Bcr-Abl1 and Abl1 were evaluated. Measurement of protein levels and phosphorylation of Bcr-Abl1 major substrate CrkL was also evaluated.
