# Supplementary material
Source: PubMed Central journal article supplement (PMC5421616)
Supplement: Supp_Fig3.pdf [file Supp_Fig3.pdf]

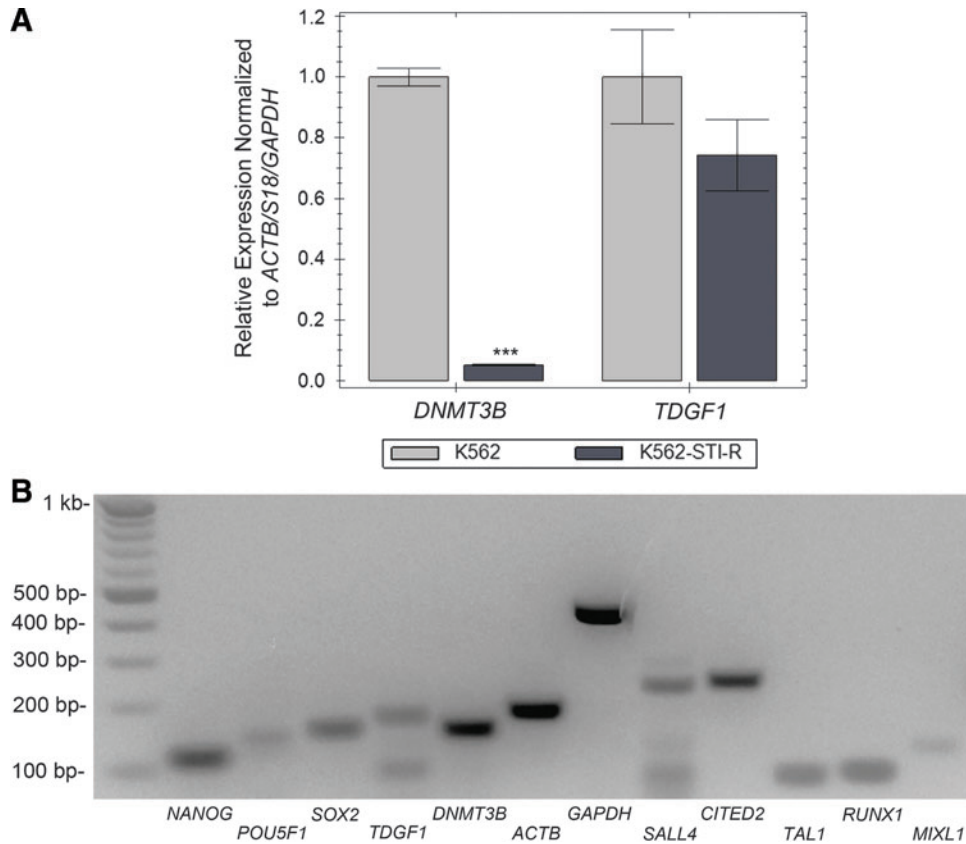

**SUPPLEMENTARY FIG. S3.** (A) Analysis of *DNMT3B* and *TDGF1* expression in K562 or IM-resistant K562-STI-R cells. Normalized expression relative to *ACTB*, *S18*, and *GAPDH*, expressed as fold change, is presented. Samples were run in triplicates; representative data from three independent analyses are shown. \*\*\* $P < 0.001$ . (B) PCR confirmation in K562 cells of correct amplicon sizes generated by designed primer pairs to evaluate *NANOG*, *POUF51*, *SOX2*, *TDGF1*, *DNMT3B*, *SALL4*, *CITED2*, *TAL1*, *RUNX1*, *MIXL1*, *ACTB*, and *GAPDH* transcript levels using SYBR green-based RT-PCR. Amplicon sizes: *NANOG* – 116 bp, *POUF51* – 156 bp, *SOX2* – 155 bp, *TDGF1* – 94 bp, *DNMT3B* – 154 bp, *SALL4* – 129 bp, *CITED2* – 241 bp, *TAL1* – 86 bp, *RUNX1* – 92 bp, *MIXL1* – 130 bp, *ACTB* – 250 bp, and *GAPDH* – 455 bp. Two bands observed for *TDGF1* and *SALL4* may represent alternative splicing variants.
