# Supplementary material
Source: PubMed Central journal article supplement (PMC5421616)
Supplement: Supp_Fig5.pdf [file Supp_Fig5.pdf]

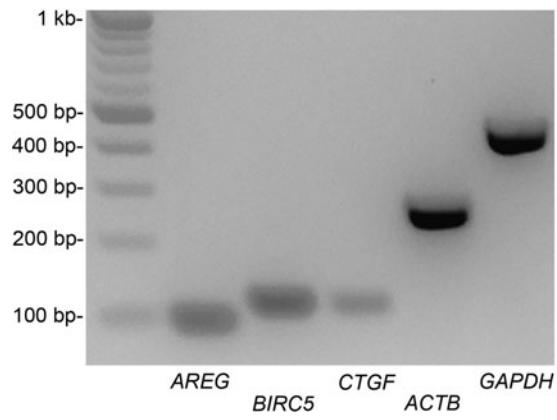

**SUPPLEMENTARY FIG. S5.** PCR confirmation in K562 cells of correct amplicon sizes generated by designed primer pairs to evaluate *AREG*, *BIRC5*, *CTGF*, *ACTB*, and *GAPDH* transcript levels using SYBR green-based RT-PCR. Amplicon sizes: *AREG* – 97 bp, *BIRC5* – 118 bp, *CTGF* – 115 bp, *ACTB* – 250 bp, and *GAPDH* – 455 bp.
