# Supplementary material
Source: PubMed Central journal article supplement (PMC5421616)
Supplement: Supp_Fig6.pdf [file Supp_Fig6.pdf]

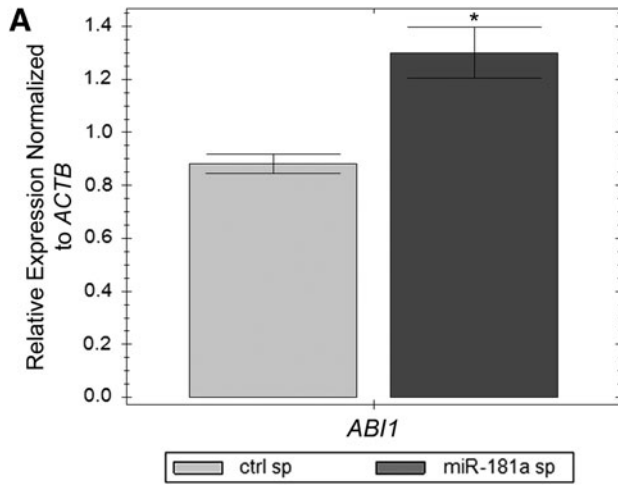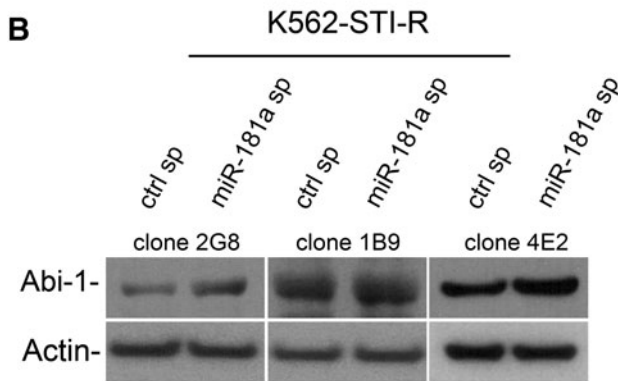

**SUPPLEMENTARY FIG. S6.** (A) RT-PCR evaluation of the levels of *ABI1* transcript in K562-STI-R cells expressing control or miR-181a sponge inhibitor. Normalized expression relative to *ACTB* expressed as fold change, is presented. Samples were run in triplicates; representative data from three independent analyses are shown. \* $P < 0.05$ . (B) Western blot analysis was performed on the whole cell lysates K562-STI-R expressing control or miR-181a sponge inhibitor. Protein levels of Abi-1 were evaluated by using three various antibodies, recognizing three different isoforms of the protein.
