# Supplementary material
Source: PubMed Central journal article supplement (PMC5421616)
Supplement: Supp_Fig7.pdf [file Supp_Fig7.pdf]

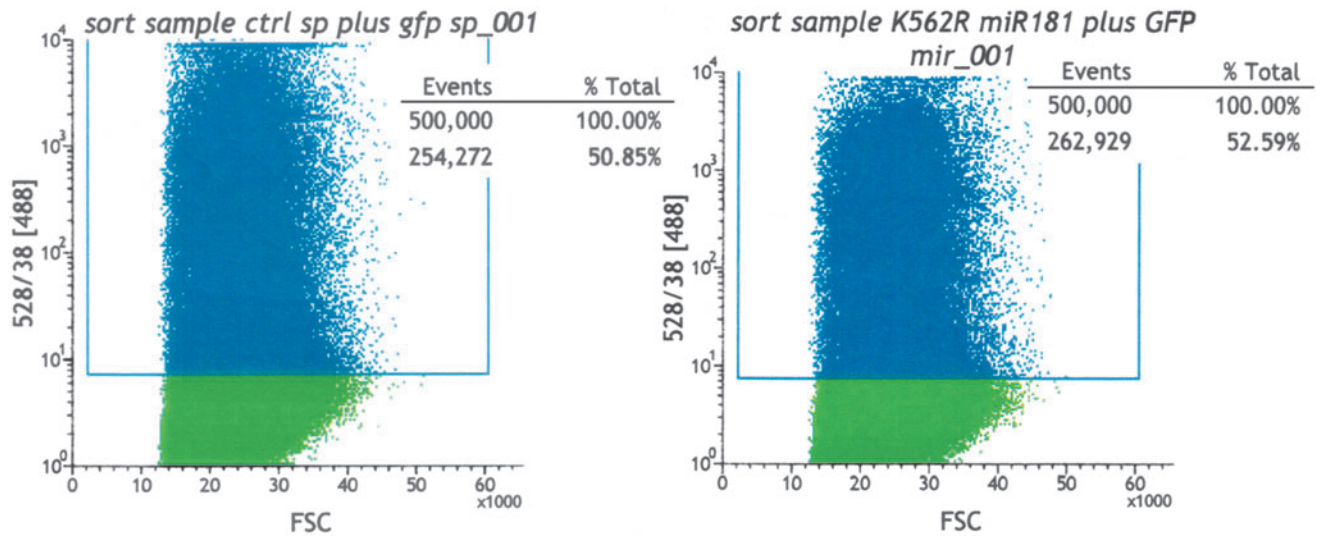

**SUPPLEMENTARY FIG. S7.** FACS analysis of electroporation efficiency of K562-STI-R cells electroporated with vectors encoding GFP-tagged control or miR-181a sponge inhibitor. DNA electroporation was performed with Neon<sup>®</sup> Transfection System.
